# Supplementary material
Source: MDPI journal article supplement (https://www.mdpi.com/2076-3417/13/14/8053)
Supplement: s1 [file s1]

# Fabrication of Polysaccharide-Based Coaxial Fibers Using Wet Spinning Processes and Their Protein Loading Properties

Takuya Sagawa <sup>1,2</sup>, Hiroki Morizumi <sup>2</sup>, Kazutoshi Iijima <sup>1,2,†</sup>, Yusuke Yataka <sup>1,2</sup> and Mineo Hashizume <sup>1,2,\*</sup>

<sup>1</sup> Department of Industrial Chemistry, Faculty of Engineering, Tokyo University of Science, 6-3-1 Niijuku, Katsushika-ku, Tokyo 125-8585, Japan; t\_sagawa@ci.tus.ac.jp (T.S.); iijima-kazutoshi-mh@ynu.ac.jp (K.I.); yataka6105162@oji-gr.com (Y.Y.)

<sup>2</sup> Graduate School of Engineering, Tokyo University of Science, 6-3-1 Niijuku, Katsushika-ku, Tokyo 125-8585, Japan; morizumih@sc.sumitomo-chem.co.jp

\* Correspondence: mhashizu@ci.tus.ac.jp; Tel.: +81-3-5876-1658

† Current address: Faculty of Engineering, Yokohama National University, 79-5, Tokiwadai, Hodogaya-ku, Yokohama 240-8501, Japan.

**–Totals– 3 pages, 2 figures**

## Table of Contents

|           |                                                                                                                                    |    |
|-----------|------------------------------------------------------------------------------------------------------------------------------------|----|
| Figure S1 | Diameters of ALG-Ca fibers and ALG-PIC fibers with each concentration of CHI solutions. ....                                       | S2 |
| Figure S2 | Fluorescence microscopic images of ALG-PIC fibers and schematic image of irradiation and excitation light through the fibers. .... | S3 |

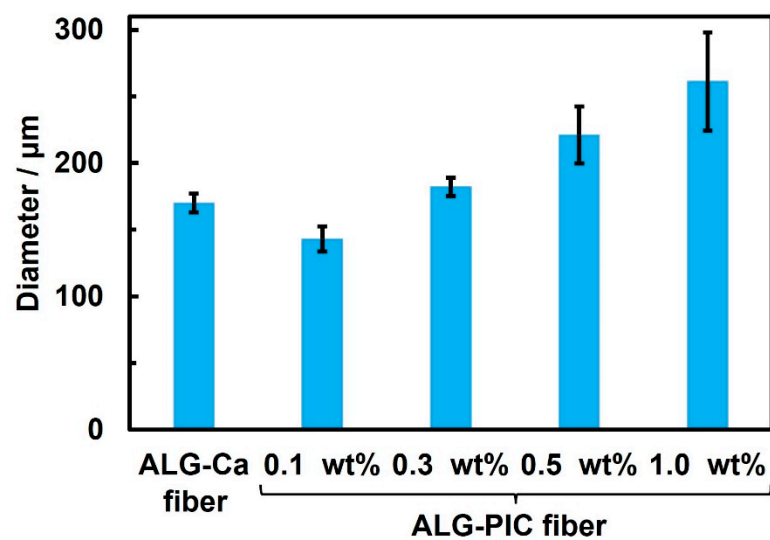

**Figure S1.** Diameters of ALG-Ca fibers and ALG-PIC fibers with each concentration of CHI solution.

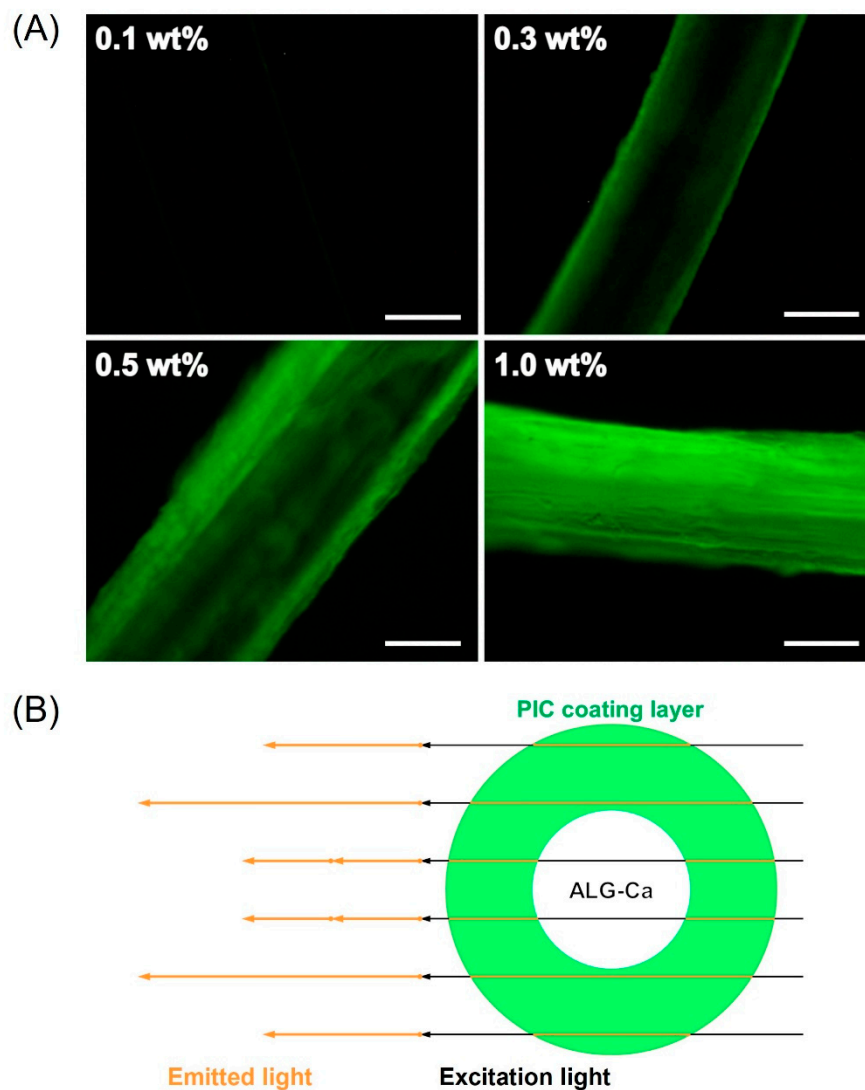

**Figure S2.** (A) fluorescence microscopic images of ALG-PIC fibers. The PICs were composed of fluorescein-labeled CS (FL-CS) (1wt% to unlabeled CS) and CHI. (B) Schematic image of excitation and emitted light through the fibers coated PICs consisting of FL-CS and CHI.
